# Supplementary material for: Economic elasticities of input substitution using data envelopment analysis
Source: PLoS One. 2019 Aug 8;14(8):e0220478. doi: 10.1371/journal.pone.0220478 (PMC6687138; doi:10.1371/journal.pone.0220478)
Supplement: S2 File — (CSV) [file pone.0220478.s002.csv]

n	fuel	fert	herb	seed	labor	mach	land	cval
Farm1	58.944	83.14978585	125.9093453	61.9585396	180.2929936	17.25097345	51	15958.512
Farm2	229.3642667	146.0909828	93.1729155	181.9422958	607.1321656	49.73230088	179.9	49652.251
Farm3	282.2752	221.9774279	77.78035814	175.6806931	694.8057325	74.67	138.2	76618.08
Farm4	278.7072	250.0868156	177.8925574	352.7266399	1416.020701	67.72460177	276.9	106046.192
Farm5	483.8730667	200.7884014	197.9171796	313.1930693	2038.113057	162.8700885	293	148937.76
Farm6	324.0618667	261.0370413	331.7193621	324.484375	1378.621815	110.1974336	288.6	136948.86
Farm7	215.7829333	311.5175368	250.0839396	297.6794554	1191.735669	73.82707965	241.2	109188.48
Farm8	270.0416	279.2929737	228.3724119	530.7875928	1118.216561	92.67752212	283.2	89359.092
Farm9	136.4192	220.4442644	100.8933968	280.987005	957.3821656	25.48867257	202	80580.384
Farm10	261.8453333	145.8643362	157.9742585	217.7753713	829.1321656	109.2535398	212.83	86456.566
Farm11	249.1290667	219.8981364	135.2266368	290.0849319	882.0995223	74.01672566	248.5	90195.648
Farm12	19.79466667	16.32052321	7.943480694	28.08555074	287.8136943	14.76442478	25	7335.9
Farm13	170.8954667	197.4084964	179.8637381	368.7107054	2349.752389	172.01	374.7	109592.945
Farm14	163.0661333	131.0568353	356.0716284	178.9758663	939.272293	83.66212389	161	65502.378
Farm15	126.0858667	184.8014817	240.766648	199.9071782	1454.044586	66.00876106	251	71882.413
Farm16	184.232	250.3897442	342.1980974	293.402073	1571.740446	54.93371681	230.25	104961.549
Farm17	199.7024	104.0745457	70.11751539	172.1683168	545.044586	60.43141593	165.7	49257.399
Farm18	102.3429333	112.7242736	174.1077224	105.3598391	430.8853503	22.89681416	92.7	45673.661
Farm19	188.7456	167.4383609	204.8405148	152.1813119	574.5549363	32.8339823	113	60185.884
Farm20	41.7552	60.00694525	32.34471181	77.18920173	388.2898089	39.57920354	55	13994.64
Farm21	223.6906667	336.7952309	160.9437605	322.2600557	1492.710191	67.26584071	262	106110
Farm22	1808.6864	1508.068063	1636.653609	1311.912129	5291.197452	384.5044248	1114.6	520019.607
Farm23	329.8917333	599.2447042	368.0500839	618.0383663	1666.433121	26.00300885	441	165745.44
Farm24	109.6154667	133.4365089	163.6578064	150.5498144	1113.678344	38.51292035	144	57493.68
Farm25	998.2304	470.7257784	330.6659205	986.5465656	3050.826433	263.8130088	937.7	511479.306
Farm26	161.3232	73.18150249	225.0277001	153.9463181	490.8065287	21.44115044	158.2	71349.64
Farm27	77.69546667	21.56927885	45.81337437	36.79656559	23.36066879	10.00637168	36	11908.8
Farm28	657.3290667	1012.396574	886.1186346	689.3114171	2665.748408	221.9661062	600	375535.096
Farm29	77.72693333	49.39622642	158.9535534	159.0792079	1049.281051	26.8719469	103	46013.8
Farm30	193.0613333	251.5707837	247.3665361	155.9670483	1489.669586	83.98433628	126	49606.2
Farm31	427.2026667	519.0861211	498.1085618	466.1336634	1698.019108	166.8672566	500	226784.1
Farm32	183.3290667	85.28533395	161.3094572	115.6981745	889.3089172	49.45858407	121.4	84357.972
Farm33	1040.9552	1520.950457	761.0486849	1373.124691	8168.789809	424.420531	1136.4	865673.118
Farm34	477.6784	734.8371339	648.0567991	541.460396	1483.797771	219.4046903	895.3	227698.847
Farm35	498.6224	476.9070494	1409.900392	624.5445545	1068.859076	74.35530973	562	140934.394
Farm36	1195.2704	1531.6216	1228.20817	1353.217822	3444.208599	311.1724779	1232	701170.75
Farm37	41.86773333	913.3682139	806.0053162	1625.801052	1454.445064	2157.518584	1258.6	785020.635
Farm38	255.7386667	737.1020951	513.7590935	969.6082921	4933.076433	125.2707965	908.36	556759.945
Farm39	815.2608	1140.930316	1127.748181	1459.318688	3858.39172	217.970177	1025.36	537277.79
Farm40	2104.799467	2219.562449	1035.366536	2094.693688	6941.589172	245.030885	1682	1055198.34
Farm41	105.6944	364.2702859	92.51454952	370.5445545	3640.051752	62.65486726	348.3	176567.202
Farm42	2286.341333	2159.451325	1297.146055	1415.006188	5732.39172	524.5117699	1146.2	616427
Farm43	740.4282667	1302.234055	482.6524902	1021.039604	1582.41879	112.1747788	750	357000
Farm44	167.1408	222.0866998	257.8242865	189.3100248	1087.53742	76.26424779	236.7	78214.95
Farm45	198.8549333	187.0912143	229.3850028	243.9091894	1209.071656	110.0069912	208.5	64203.822
Farm46	61.65333333	207.4317629	147.9756575	104.4436881	478.9235669	10.52185841	177.6	66402.794
Farm47	497.3296	509.3182081	1071.936206	461.9121287	2163.828822	112.8923894	500	205273.95
Farm48	161.5637333	146.9465216	250.8181309	206.023979	1248.917197	46.57380531	236.4	76874.928
Farm49	204.776	171.1702743	163.8866816	196.1045792	1041.548567	47.15123894	244	101223.772
Farm50	262.3157333	226.5076977	441.4661444	249.9381188	731.8726115	140.5590265	219.3	76468.44
Farm51	130.8176	95.52286144	179.238948	82.09591584	782.116242	31.09522124	128	46651.912
Farm52	617.3242667	530.3320986	437.0036374	705.4274443	2928.389331	150.9250442	543.3	200481.185
Farm53	762.1194667	1499.942123	666.8718523	879.130724	5012.219745	126.0429204	753	285830.454
Farm54	570.8213333	1024.134738	500.9233352	594.4616337	1713.176752	245.0186726	566.8	249642.12
Farm55	440.8501333	363.4240074	642.0461668	439.9263614	2054.178344	237.320354	463.7	141923.262
Farm56	63.23146667	204.3640468	163.5128707	155.955755	924.4347134	111.3133628	192.23	57789.194
Farm57	159.3312	179.3147355	170.5372132	241.8626238	1868.610669	66.8099115	189.2	58853.49
Farm58	287.9264	465.2135664	709.4851707	459.3876856	2017.591561	40.48300885	529.48	184438.316
Farm59	950.5653333	954.5086237	1514.577504	627.4907178	3940.574841	258.2886726	966.2	384604.937
Farm60	118.8122667	87.41474708	191.1698377	54.43378713	526.2062102	57.70088496	102.78	45305.05
Farm61	165.7594667	348.6711425	121.5671517	142.7452042	891.8503185	33.90637168	202.2	61097.351
Farm62	69.07146667	59.85646487	33.57582541	74.25742574	233.0366242	16.78707965	59.91	19403.902
Farm63	647.6538667	1089.072925	572.2655288	606.8558168	2868.909236	295.790531	612	200265.592
Farm64	648.4586667	878.7359648	776.1052043	694.6316522	2653.753185	152.7087611	544.33	252460.8
Farm65	23.37173333	42.82903114	41.96978176	46.78279703	151.2133758	13.94725664	47.3	11185.504
Farm66	494.5968	880.355944	746.2227196	825.4794245	2087.649682	190.9369912	889	291869.5
Farm67	264.1610667	365.343211	215.6407387	390.3310644	810.455414	50.38743363	367.6	137882.82
Farm68	36.92533333	42.48234749	20.07302742	66.35767327	252.7173567	10.44433628	54	8169.3
Farm69	88.01333333	267.8502141	129.4297706	356.0736386	995.3431529	27.05292035	219	108186
Farm70	932.6885333	524.4132423	605.2031337	715.0826114	2821.374204	66.79814159	1010.37	448998.491
Farm71	186.8522667	217.4890612	228.7520985	163.7925433	1361.464968	54.41823009	299	135566.028
Farm72	185.8266667	206.7299456	391.8925574	250.6270111	877.3280255	51.34530973	170	93925
Farm73	732.6864	502.026855	380.4784555	476.5717822	2805.707006	179.2772566	396.06	272388.648
Farm74	1016.445333	1329.70529	1230.911304	1280.503713	8580.496815	407.1710619	1115.08	637918.363
Farm75	2365.043733	2946.579234	1646.451595	1918.825495	3209.789809	1101.294602	1519.5	1066196.602
Farm76	2053.8512	1488.123047	1339.982373	1878.177754	7134.086783	466.4376991	1480	1108081.328
Farm77	2073.170667	1436.374002	976.355624	1392.982673	6490.964172	224.429646	1242	771598.68
Farm78	516.8426667	679.5544623	316.4669838	465.2277228	2712.527866	155.239469	379.7	176344.071
Farm79	242.3658667	414.6659336	535.6578064	294.0915842	3032.602707	167.2006195	219.51	109580.334
Farm80	43.26666667	499.8291469	373.8100168	400.7314356	1837.656847	439.5849558	278.8	134908.95
Farm81	343.9242667	622.0845005	978.1007275	532.6952351	2623.270701	136.6092035	393	217600.17
Farm82	529.8533333	265.9330941	365.5581981	402.4933478	1850.230892	48.83168142	290.5	143543.313
Farm83	801.368	921.0364626	733.227756	905.5108292	1983.382166	196.0851327	783.2	584757
Farm84	23.64586667	7.156499595	7.72887521	13.92326733	60.65286624	4.56840708	20	1636
Farm85	365.7744	508.4381294	346.1057639	464.8149752	812.9482484	128.4159292	501.94	166252.04
Farm86	64.08053333	36.92557009	88.61219922	125.6188119	314.4625796	24.26973451	116	31856.92
Farm87	112.0906667	110.545202	267.2076105	142.1875	866.183121	106.9824779	213	38787.837
Farm88	57.2976	42.96295868	192.3251259	78.7137995	338.6289809	41.05389381	112	28798
Farm89	1925.704	1529.274222	2617.711248	1296.936881	4479.139331	501.0671681	2039.6	365033.821
Farm90	154.2336	28.16298183	53.24566312	213.1342822	553.897293	96.67292035	310	116698.715
Farm91	80.63253333	57.04363931	73.51259093	54.57920792	491.2133758	25.79646018	112.29	39252.328
Farm92	330.888	73.26739206	396.6561276	216.5841584	948.4307325	69.2139823	269.7	69164
Farm93	644.1317333	391.4806112	986.3435926	501.5162438	2856.861465	190.1265487	716.02	283236.99
Farm94	1546.877333	1652.355597	2620.229435	2427.87995	5227.257166	296.4910619	3123.1	1084810.116
Farm95	179.6090667	218.7290196	443.0889759	191.9399752	838.4737261	64.47265487	250.25	34838.648
Farm96	168.7584	151.490103	108.7395076	174.8474629	550.0318471	121.7790265	288.9	80065.35
Farm97	202.7264	353.2131034	794.0209849	576.664604	1417.613854	433.8711504	1221.56	439383.907
Farm98	130.6026667	50.5719412	125.0117515	99.73700495	460.8367834	60.35654867	157.8	28656.48
Farm99	1215.7296	78.0530154	1213.346391	611.3706683	3683.625	149.2529204	1166.17	324592.583
Farm100	1215.7296	78.0530154	1213.346391	611.3706683	3683.625	149.2529204	1166.17	324592.583
Farm101	717.6506667	247.5538836	294.2926693	396.3363243	1984.379777	203.1833628	821.6	112260.525
Farm102	21.9968	93.63977312	186.850028	80.44554455	106.8479299	21.42690265	54	13671.36
Farm103	987.112	554.9197824	763.9370453	489.3972772	1486.647293	255.1353982	762.59	228701.947
Farm104	12.58986667	4.42180808	12.7308338	4.470915842	15.08996815	2.257522124	8	1565.6
Farm105	604.0538667	357.8000926	1051.090375	353.546875	2204.741242	173.8042478	816.03	195622.88
Farm106	95.16213333	134.9923602	575.1964186	19.33787129	301.2675159	68.96061947	122.9	43407.488
Farm107	20.94666667	194.3156615	225.4062675	99.32240099	357.6568471	111.3907965	144	61560
Farm108	23.61546667	28.11031369	33.83044208	29.63304455	179.714172	14.63787611	68	15776
Farm109	245.1530667	169.5579349	951.5221041	171.7388614	1301.567675	79.88212389	355.6	96302.867
Farm110	53.5824	124.3795578	153.7386682	115.1454208	183.0820064	13.58168142	76.9	18131.877
Farm111	537.952	340.2940155	419.6373811	391.9882426	2324.83758	222.8743363	434.25	237075.784
Farm112	43.31786667	35.73920593	26.80358142	48.59112005	318.0382166	25.51150442	40.6	11524.554
Farm113	726.5552	1190.529691	679.2800783	794.7201423	4074.592357	202.8904425	534	344430
Farm114	185.9989333	144.4381294	324.6052043	156.5594059	576.8980892	46.85079646	159.64	68112.637
Farm115	1614.949867	1857.116333	956.1516508	1376.925124	5103.118631	247.3034513	1409.19	764815.166
Farm116	598.2613333	394.6810973	282.4983212	434.3440594	1709.273885	179.5268142	443.55	199564.392
Farm117	1262.767467	1988.077324	1279.238948	1503.016708	6063.349522	401.2864602	1143	585216
Farm118	3694.192	969.4484315	752.4289312	1434.643564	10914.52627	414.3321239	1187.65	694326.01
Farm119	525.5221333	291.0043987	594.9149412	594.5032488	2499.649682	47.90176991	500.8	282548.175
